# Supplementary material for: A Feasibility Study to Increase Chronic Hepatitis C Virus RNA Testing and Linkage to Care among Clients Attending Homeless Services in Amsterdam, The Netherlands
Source: MDPI journal article supplement (doi:10.3390/diagnostics11071197), 2021-06-30
Supplement: s1 [file s1]

**Supplementary Table S1. Prior distributions used in analysis**

| Assumed direction of association | Dichotomous variable OR (95% CrI) | Continuous variable OR (95% CrI) |
|----------------------------------|-----------------------------------|----------------------------------|
| Possibly protective              | NA                                | 0.90 (0.23-3.60)                 |
| Unknown direction                | 1.00 (0.25-4.00)                  | NA                               |
| Possibly harmful                 | 1.50 (0.38-6.00)                  | NA                               |
| Probably harmful                 | 2.00 (0.50-8.00)                  | NA                               |

Abbreviations: CrI, credible interval; OR, odds ratio; NA, not applicable (i.e. not applied in analysis)

All priors based on log-normal distribution with mean  $\ln(\text{HR})$  and variance 1/2 [1].

**Reference:**

1. Greenland S. Prior data for non-normal priors. Stat Med. 2007 Aug 30;26(19):3578-

**Supplementary Table S2. Posterior estimates of risk factors for HCV-RNA positive status (using non-informative priors\*)**

|                                                        | Posterior OR (95% CrI) |
|--------------------------------------------------------|------------------------|
| <i>Sociodemographic characteristics</i>                |                        |
| Age (per 10 year increase) <sup>a</sup>                | 0.63 (0.37-1.12)       |
| Females (versus males)                                 | 0.96 (0.03-5.75)       |
| Eastern European origin                                | 10.54 (2.24-82.36)     |
| <i>HCV-related risk factors</i>                        |                        |
| Injecting drug use (ever)                              | 10.49 (1.91-77.08)     |
| Injecting drug use (last 30 days)                      | 11.53 (1.91-66.84)     |
| Ever sharing needles or syringes                       | 6.80 (0.81-36.95)      |
| Ever sharing straws/crack pipe                         | 2.06 (0.38-16.58)      |
| Ever sharing razors/toothbrush                         | 0.75 (0.02-5.67)       |
| Procedures <sup>b</sup> in HCV endemic country         | 0.33 (0.01-2.54)       |
| Tattoo/piercing in nonregistered location <sup>c</sup> | 0.46 (0.02-3.40)       |
| <i>Sexual behavior</i>                                 |                        |
| Condomless anal sex                                    | <0.01 (<0.01-1.52)     |
| Sharing of sex toys                                    | <0.01 (<0.01-2.36)     |

Abbreviations: OR, odds ratio; CrI, credible interval.

\*Non-informative priors (i.e. those that bear minimal influence when estimating the posterior distribution) were log-normal distributions with mean  $\ln(1)$  and variance 100.

**Supplementary Table S3. Prior and posterior estimates of risk factors for HCV-RNA positive status (using priors with weaker effects)**

|                                   | <b>Posterior OR (95% CrI)</b> | <b>Posterior OR (95% CrI)</b> |
|-----------------------------------|-------------------------------|-------------------------------|
| Eastern European origin           | 1.50 (0.38-6.00)              | 2.79 (1.03-7.75)              |
| Injecting drug use (ever)         | 1.50 (0.38-6.00)              | 3.21 (1.14-9.41)              |
| Injecting drug use (last 30 days) | 1.50 (0.38-6.00)              | 3.42 (1.09-10.37)             |

Abbreviations: CrI, credible interval; OR, odds ratio.

ORs and 95% CrI were obtained from univariable Bayesian exponential survival models.

**Supplementary Table S4.** Risk factors for HCV-RNA positive status, without using a Bayesian approach

(to illustrate that using ordinary regression is not appropriate due to sparse data issues)

|                                                        | OR (95% CI)         |
|--------------------------------------------------------|---------------------|
| <i>Sociodemographic characteristics</i>                |                     |
| Age (per 10 year increase) <sup>a</sup>                | 0.61 (0.36-1.10)    |
| Females (versus males)                                 | 1.20 (0.14-9.95)    |
| Eastern Europe origin                                  | 15.38 (2.79-84.72)  |
| <i>HCV-related risk factors</i>                        |                     |
| Injecting drug use (ever)                              | 13.33 (2.28-78.14)  |
| Injecting drug use (last 30 days)                      | 19.14 (3.26-112.56) |
| Ever sharing needles/syringes                          | 13.30 (1.96-90.53)  |
| Ever sharing straws/crack pipe                         | 2.25 (0.40-12.67)   |
| Ever sharing razors/toothbrush                         | 0.71 (0.08-6.54)    |
| Procedures <sup>b</sup> in HCV endemic country         | 0.40 (0.05-3.52)    |
| Tattoo/piercing in nonregistered location <sup>c</sup> | 0.73 (0.08-6.31)    |
| <i>Sexual behavior</i>                                 |                     |
| Condomless anal sex                                    | --                  |
| Sharing of sex toys                                    | --                  |

<sup>a</sup>Age was centered at 18 years.

<sup>b</sup>Includes any medical procedure, blood transfusion, tattooing, piercing, and/or dental procedure.

<sup>c</sup>Taking place in the Netherlands.

-- OR could not be calculated because the given factor was not found in one of the HCV-RNA groups.  
CrI, credible interval; HCV, hepatitis C virus; OR, odds ratio; IQR, interquartile range.

**Supplementary Table S5. The presence of HCV related risk factors and sexual behavioral factors for each HCV RNA positive individual**

|                                                | HCV RNA positive individuals (N=7) |    |    |    |    |    |    | Total N<br>(presence<br>= yes), % |
|------------------------------------------------|------------------------------------|----|----|----|----|----|----|-----------------------------------|
| <i>HCV related risk factor</i>                 | #1                                 | #2 | #3 | #4 | #5 | #6 | #7 |                                   |
| Injecting drug use (ever)                      | 1                                  | M  | 1  | 1  | 0  | 0  | 1  | 4, 67%                            |
| Injecting drug use (last 30 days)              | 1                                  | M  | 1  | 1  | 0  | 0  | 0  | 3, 50%                            |
| Ever sharing needles/syringes                  | 0                                  | M  | 1  | 0  | 0  | 0  | 1  | 2, 33%                            |
| Ever sharing straws/crack pipe                 | 1                                  | M  | 0  | 1  | 1  | 0  | 1  | 4, 67%                            |
| Ever sharing razors/toothbrush                 | 0                                  | M  | 0  | 0  | 0  | 0  | 1  | 1, 17%                            |
| Procedures <sup>b</sup> in HCV endemic country | 1                                  | M  | 0  | 0  | 0  | 0  | 0  | 1, 17%                            |
| Tattoo/piercing in nonregistered location      | 0                                  | 0  | 0  | 0  | 0  | 0  | 1  | 1, 14%                            |
| <i>Sexual behavior</i>                         |                                    |    |    |    |    |    |    |                                   |
| Condomless anal sex                            | 0                                  | M  | 0  | 0  | 0  | 0  | 0  | 0, 0%                             |
| Sharing of sex toys                            | M                                  | M  | 0  | 0  | M  | 0  | 0  | 0, 0%                             |

1: variable is present, 0: variable is not present, M: variable is missing in this individual.
